# Supplementary material for: The Impact of a Post-Prescription Review and Feedback Antimicrobial Stewardship Program in Lebanon
Source: MDPI journal article supplement (doi:10.3390/antibiotics11050642), 2022-05-11
Supplement: s1 [file s1]

**Supplementary Table S1.** Physician survey responses: basic demographics.

| Characteristic                                      | Total (n = 20)       |
|-----------------------------------------------------|----------------------|
| Gender                                              |                      |
| Female                                              | 8                    |
| Male                                                | 12                   |
| Age, median                                         | 29.5<br>Range: 25–69 |
| Specialty                                           |                      |
| Medicine                                            | 14                   |
| Surgery                                             | 4                    |
| Intensive care unit                                 | 0                    |
| Other                                               | 2                    |
| Years since completion of highest education, median | 6<br>Range: 1–40     |
| Position at hospital                                |                      |
| Head of medical service                             | 5                    |
| Head of surgical service                            | 2                    |
| Medical consultant                                  | 3                    |
| Surgical consultant                                 | 1                    |
| Resident in medicine                                | 7                    |
| Resident in surgery                                 | 1                    |
| Pharmacist                                          | 0                    |
| Other                                               | 1                    |
| Hospital department                                 |                      |
| Medicine                                            | 15                   |
| Surgery                                             | 4                    |
| Intensive care unit                                 | 1                    |
| Years in current position, median                   | 4                    |
| Years at current hospital, median                   | 6.5                  |

**Supplementary Table S2.** Physician survey responses on perceptions, knowledge, systemic failures and barriers, and attitudes towards a post-prescription review and feedback program (n = 20).

|                                                                                                                     | Strongly Disagree | Disagree | Agree | Strongly Agree |
|---------------------------------------------------------------------------------------------------------------------|-------------------|----------|-------|----------------|
| <b>Perceptions and attitudes regarding antibiotics</b>                                                              |                   |          |       |                |
| Inappropriate antibiotic prescribing puts patients at risk                                                          | 1                 | 0        | 1     | 18             |
| It is always better to over-prescribe than under-prescribe antibiotics                                              | 7                 | 11       | 1     | 0              |
| New antibiotics are being developed to solve the problem of resistance                                              | 2                 | 4        | 10    | 3              |
| In case of doubt, it is preferable to use a wide spectrum antibiotic to ensure the patient is cured of an infection | 0                 | 3        | 15    | 2              |
| As a healthcare provider, I can contribute to appropriate use of antibiotics                                        | 0                 | 0        | 7     | 13             |
| Antimicrobial resistance is a problem in my daily practice                                                          | 0                 | 2        | 6     | 11             |
| Antimicrobial resistance is a problem in the hospital where I work                                                  | 0                 | 0        | 11    | 8              |
| Antimicrobial resistance is a problem in Lebanon                                                                    | 0                 | 0        | 6     | 14             |
| Antimicrobial resistance is a problem worldwide                                                                     | 0                 | 0        | 7     | 13             |
| <b>Knowledge and resources</b>                                                                                      |                   |          |       |                |
| I am aware of the antimicrobial resistance rates and patterns at the hospital where I work                          | 1                 | 5        | 8     | 6              |
| I feel confident about my knowledge for prescribing antibiotics for my patients                                     | 0                 | 6        | 9     | 5              |
| I have received sufficient training in antibiotic prescribing through my workplace                                  | 1                 | 6        | 10    | 3              |
| I have received sufficient training in antibiotic prescribing through the Ministry of Health                        | 12                | 7        | 1     | 0              |
| I have received sufficient training in antibiotic prescribing through NGOs or other resources                       | 12                | 7        | 1     | 0              |
| I keep up with the most recent scientific literature on antibiotic resistance                                       | 0                 | 7        | 7     | 5              |



|                                                                                                                                   |    |    |    |    |
|-----------------------------------------------------------------------------------------------------------------------------------|----|----|----|----|
| I am aware of the Ministry of Health approved antibiotic treatment guidelines                                                     | 4  | 9  | 5  | 2  |
| <b>Systemic facilitators and barriers to antimicrobial stewardship</b>                                                            |    |    |    |    |
| The hospital where I work has rapid and effective diagnostic techniques for diagnosis of infectious diseases                      | 0  | 2  | 13 | 5  |
| The hospital where I work provides sufficient guidelines for diagnosis and management of patients with infections                 | 1  | 5  | 13 | 1  |
| The hospital where I work has implemented rigorous infection control measures                                                     | 0  | 2  | 12 | 6  |
| In the hospital where I work, guidelines are appropriate for the setting                                                          | 0  | 4  | 11 | 4  |
| Pharmacists and medicine shops should not be allowed to sell antibiotics without a physician prescription                         | 1  | 0  | 2  | 17 |
| Healthcare providers should be compensated for prescribing antibiotics                                                            | 13 | 2  | 1  | 1  |
| The Ministry of Health should develop more stringent regulations regarding antibiotics                                            | 0  | 0  | 7  | 13 |
| Healthcare providers need to do more to educate patients/consumers about antibiotic use and resistance                            | 0  | 0  | 9  | 11 |
| The Ministry of Health should develop campaigns to educate patients/consumers about antibiotic use and resistance                 | 0  | 0  | 8  | 12 |
| There is a need to increase education for physicians working outside of hospital settings (clinic) about antimicrobial resistance | 0  | 0  | 8  | 12 |
| There is a need to increase education for nurses and other healthcare providers about antimicrobial resistance                    | 0  | 0  | 9  | 11 |
| There is a need to increase education for nurses and other healthcare providers about antimicrobial resistance                    | 0  | 0  | 7  | 13 |
| There is a need to increase education for community pharmacists about antimicrobial resistance                                    | 0  | 0  | 5  | 15 |
| <b>Post-prescription review and feedback (PPRF) program</b>                                                                       |    |    |    |    |
| The PPRF will increase antimicrobial stewardship in the ward where I work                                                         | 0  | 0  | 10 | 9  |
| The PPRF will provide me with new knowledge about appropriate antibiotic use                                                      | 0  | 0  | 11 | 9  |
| The PPRF will increase my confidence in use of antibiotics within my medical practice                                             | 0  | 0  | 12 | 8  |
| The PPRF could be disruptive to my treatment of patients                                                                          | 4  | 13 | 2  | 1  |
| Changing prescribed medications is costly for patients                                                                            | 2  | 7  | 11 | 0  |
| Using the recommended changes could decrease risk of complications for my patients                                                | 0  | 0  | 11 | 9  |
| In the long term, the PPRF could decrease antimicrobial resistance in my country                                                  | 0  | 1  | 10 | 9  |

NGO: non-governmental organization.

**Supplementary Table S3.** Physician survey responses on supports and rewards for antimicrobial stewardship.

|                                                                                                                       | Often | Sometimes | Never |
|-----------------------------------------------------------------------------------------------------------------------|-------|-----------|-------|
| I have discussed antibiotic treatment and resistance with hospital administrators                                     | 4     | 11        | 5     |
| I have discussed antibiotic treatment and resistance with other health providers at the hospital where I work         | 12    | 8         | 0     |
| I have discussed antibiotic treatment and resistance with other health providers outside of the hospital where I work | 3     | 8         | 9     |
| I have prescribed antibiotics because patients insist on it                                                           | 2     | 4         | 14    |
| I have prescribed antibiotics so that patients continue to trust me                                                   | 1     | 2         | 16    |
| I have prescribed antibiotics to improve my relationship with patients                                                | 1     | 1         | 18    |
| I have had problems explaining to patients why they should not use antibiotics for certain conditions                 | 7     | 11        | 2     |
| I have felt that patients will use antibiotics whether I tell them to or not                                          | 5     | 11        | 4     |

**Supplementary Table S4.** Physician survey responses on useful means of increasing healthcare provider knowledge about antimicrobial resistance and treatment practices.

|                                           | Very Useful | Useful | Not Very Useful |
|-------------------------------------------|-------------|--------|-----------------|
| Seminars or workshops                     | 15          | 5      | 0               |
| Summary written materials (e.g., reports) | 12          | 8      | 0               |
| Scientific articles                       | 10          | 10     | 0               |
| Videoconferencing                         | 8           | 9      | 3               |
| Internet sites                            | 8           | 9      | 3               |



|                                               |    |    |   |
|-----------------------------------------------|----|----|---|
| Mentoring                                     | 8  | 9  | 0 |
| Short printed guidelines (e.g., pocket guide) | 15 | 4  | 1 |
| Poster with printed guideline                 | 7  | 7  | 1 |
| Webinars                                      | 6  | 10 | 4 |
